# Supplementary material for: Autotetraploidization Gives Rise to Differential Gene Expression in Response to Saline Stress in Rice
Source: MDPI journal article supplement (doi:10.3390/plants11223114), 2022-11-15
Supplement: s1 [file s1]

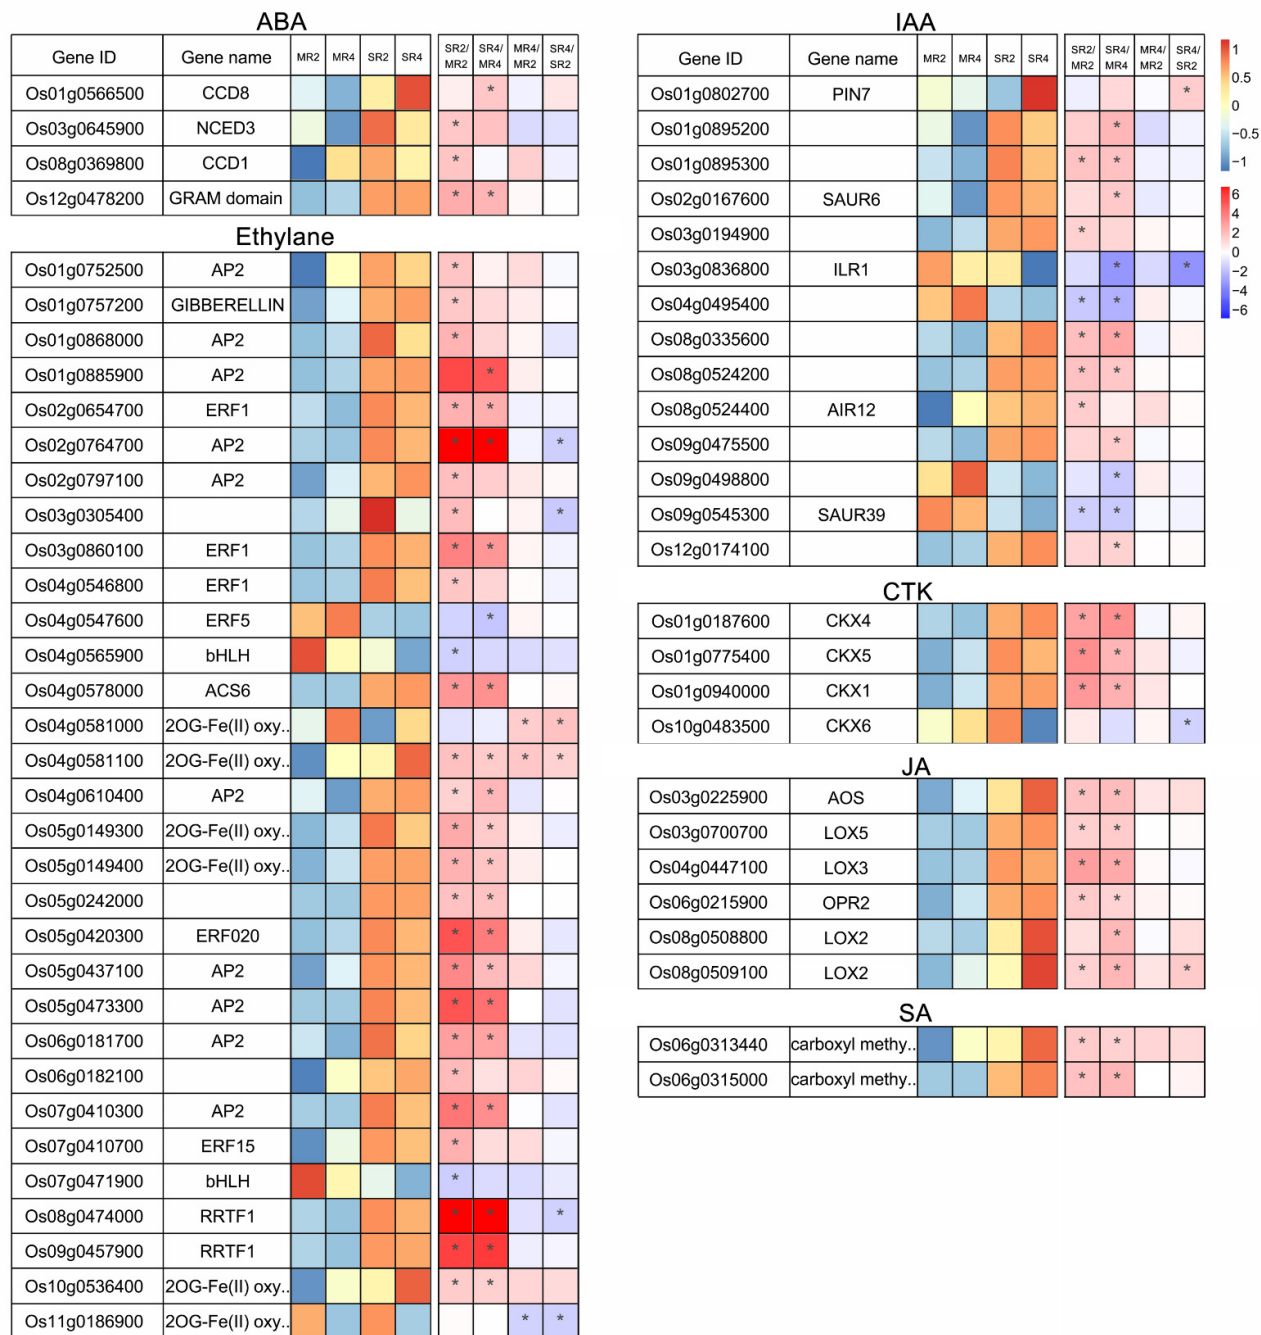

**Figure S1.** Expression profiles of genes related to phytohormones in shoots of 9311-2x and 9311-4x rice plants under mock and saline stress conditions. Heatmap of differentially expressed genes (DEGs) was generated using MapMan software. Yellow indicates genes expression levels (read\_counts per million with log2 value). White indicates the fold change (log2 value) of DEGs. \*\*  $p < 0.01$ , \*  $p < 0.05$ . MR2 and MR4 represent the root samples derived from 9311-2x and 9311-4x plants, respectively. SR2 and SR4 represent the saline stress treated root samples derived from 9311-2x and 9311-4x plants, respectively. MSh2 and MSh4 represent the shoot samples derived from 9311-2x and 9311-4x plants, respectively. SSh2 and SSh4 represent the saline stress treated shoot samples derived from 9311-2x and 9311-4x plants, respectively.

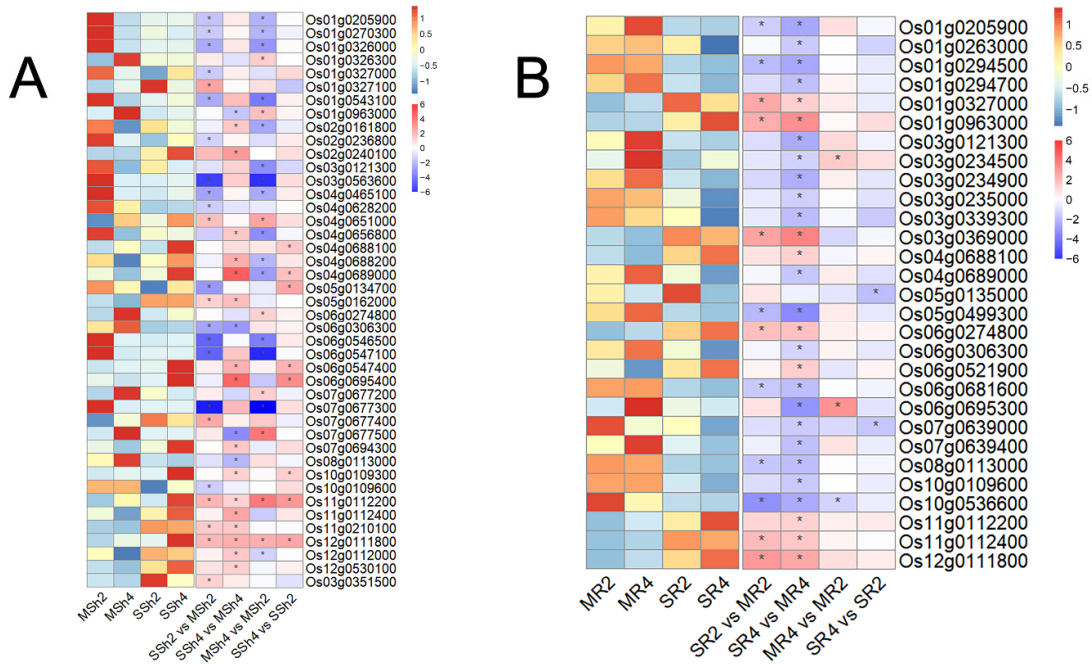

**Figure S2.** Expression profiles of genes related to peroxidase superfamily in shoots and roots of 9311-2x and 9311-4x rice plants under mock and saline stress conditions. Heatmap of differentially expressed genes (DEGs) was generated using MapMan software. Yellow indicates genes expression levels (read\_counts per million with log2 value). White indicates the fold change (log2 value) of DEGs. \*\*  $p < 0.01$ , \*  $p < 0.05$ .

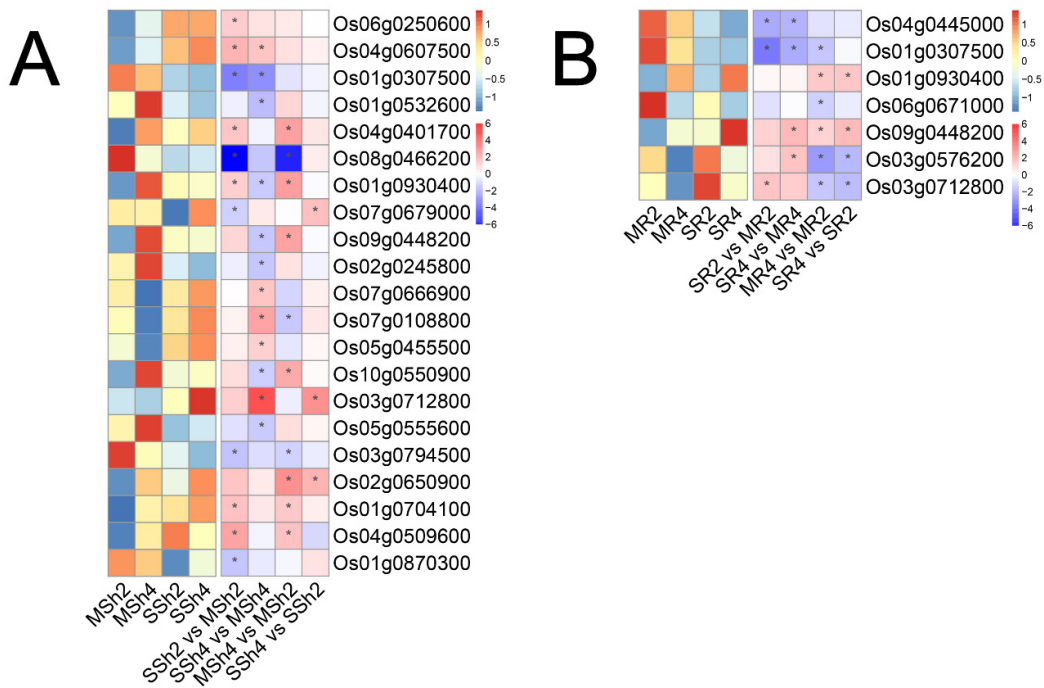

**Figure S3.** Expression profiles of genes related to ionic transport in shoots and roots of 9311-2x and 9311-4x rice plants under mock and saline stress conditions. Heatmap of differentially expressed genes (DEGs) was generated using MapMan software. Yellow indicates genes expression levels (read\_counts per million with log2 value). White indicates the fold change (log2 value) of DEGs. \*\*  $p < 0.01$ , \*  $p < 0.05$ .

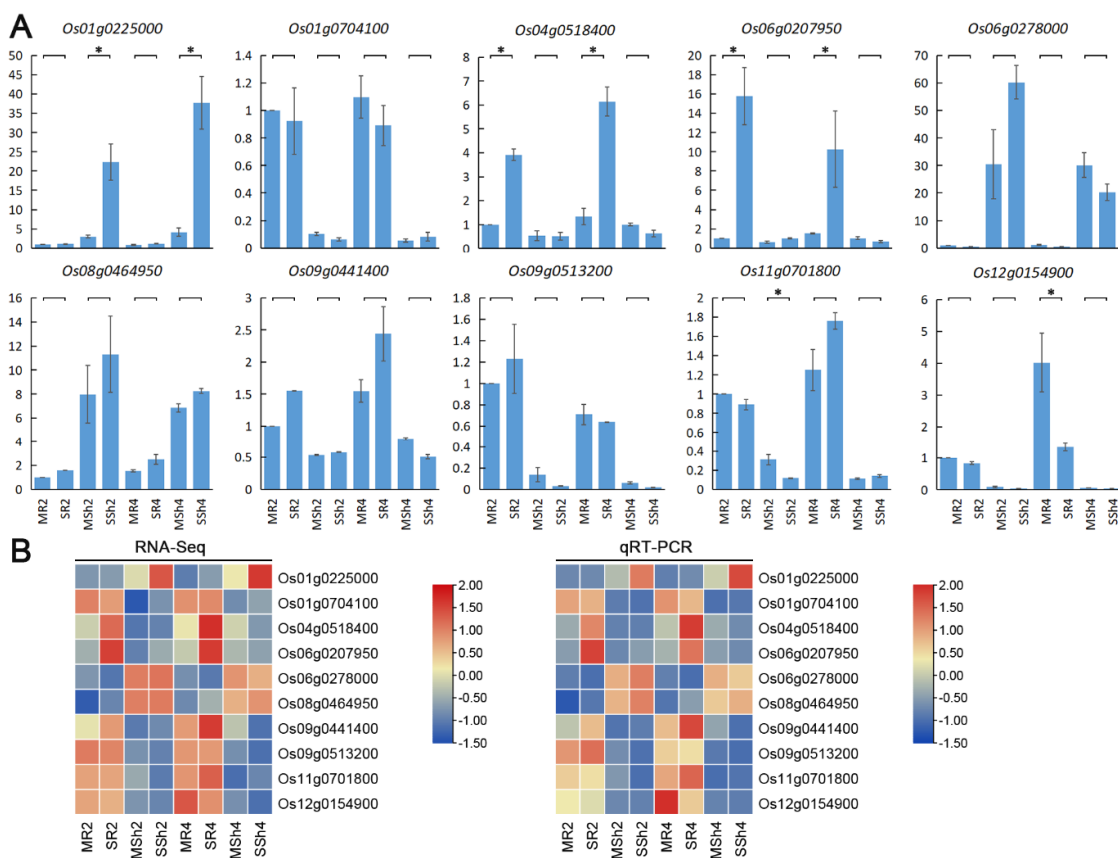

**Figure S4.** The expression of ten randomly selected genes was analyzed using quantitative reverse transcriptase polymerase chain reaction (qRT-PCR) for the verification of the transcriptome results.  
\*  $p < 0.05$ .
